# Supplementary material for: Effectiveness of Direct Laser Interference Patterning and Peptide Immobilization on Endothelial Cell Migration for Cardio-Vascular Applications: An In Vitro Study
Source: MDPI journal article supplement (doi:10.3390/nano12071217), 2022-04-05
Supplement: s1 [file s1]

Supplementary Material for:

# Effectiveness of Direct Laser Interference Patterning and Peptide Immobilization on Endothelial Cell Migration for Cardio-Vascular Applications: An In Vitro Study

Romain Schieber <sup>1,2,3</sup>, Carlos Mas-Moruno <sup>1,2</sup>, Federico Lasserre <sup>3</sup>, Joan Josep Roa <sup>2,4</sup>, Maria-Pau Ginebra <sup>1,2,5</sup>, Frank Mücklich <sup>3</sup> and Marta Pegueroles <sup>1,2,\*</sup>

<sup>1</sup> Biomaterials, Biomechanics and Tissue Engineering Group, Department of Materials Science and Engineering, Universitat Politècnica de Catalunya (UPC), EEBE, Av. Eduard Maristany, 10-14, 08019 Barcelona, Spain; romain.schieber@upc.edu (R.S.); carles.mas.moruno@upc.edu (C.M.-M.); maria.pau.ginebra@upc.edu (M.-P.G.)

<sup>2</sup> Barcelona Research Center in Multiscale Science and Engineering, Universitat Politècnica de Catalunya (UPC), 08019 Barcelona, Spain; joan.josep.roa@upc.edu

<sup>3</sup> Chair of Functional Materials, Faculty of Natural Sciences and Technology, Saarland University, 66123 Saarbrücken, Germany; lasserre@matsci.uni-sb.de (F.L.); muecke@matsci.uni-sb.de (F.M.)

<sup>4</sup> Structural Integrity, Micromechanics and Reliability of Materials Group, Department of Materials Science and Metallurgical Engineering, UPC, EEBE, 08019 Barcelona, Spain

<sup>5</sup> Institute for Bioengineering of Catalonia (IBEC), 08028 Barcelona, Spain

\* Correspondence: marta.pegueroles@upc.edu (M.P.); Tel.: +34-934054154

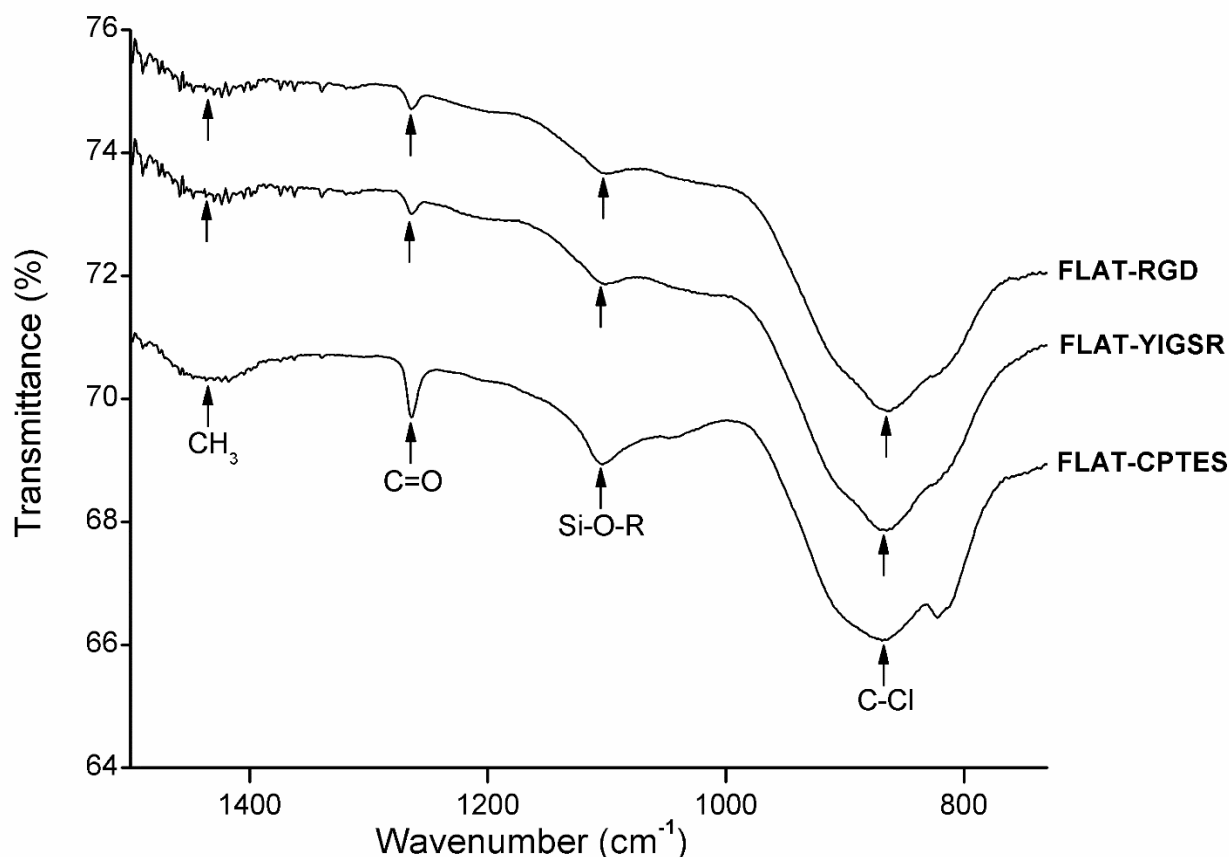

**Figure S1.** ATR-FTIR of FLAT-CPTES, FLAT-RGD and FLAT-YIGSR surfaces from 700 to 1600  $\text{cm}^{-1}$ . Arrows indicate significant peaks.
